# Supplementary material for: Whole Genome Association Mapping of Fusarium Head Blight Resistance in European Winter Wheat (Triticum aestivum L.)
Source: PubMed Central journal article supplement (PMC3579808; doi:10.1371/journal.pone.0057500), 2013-02-22

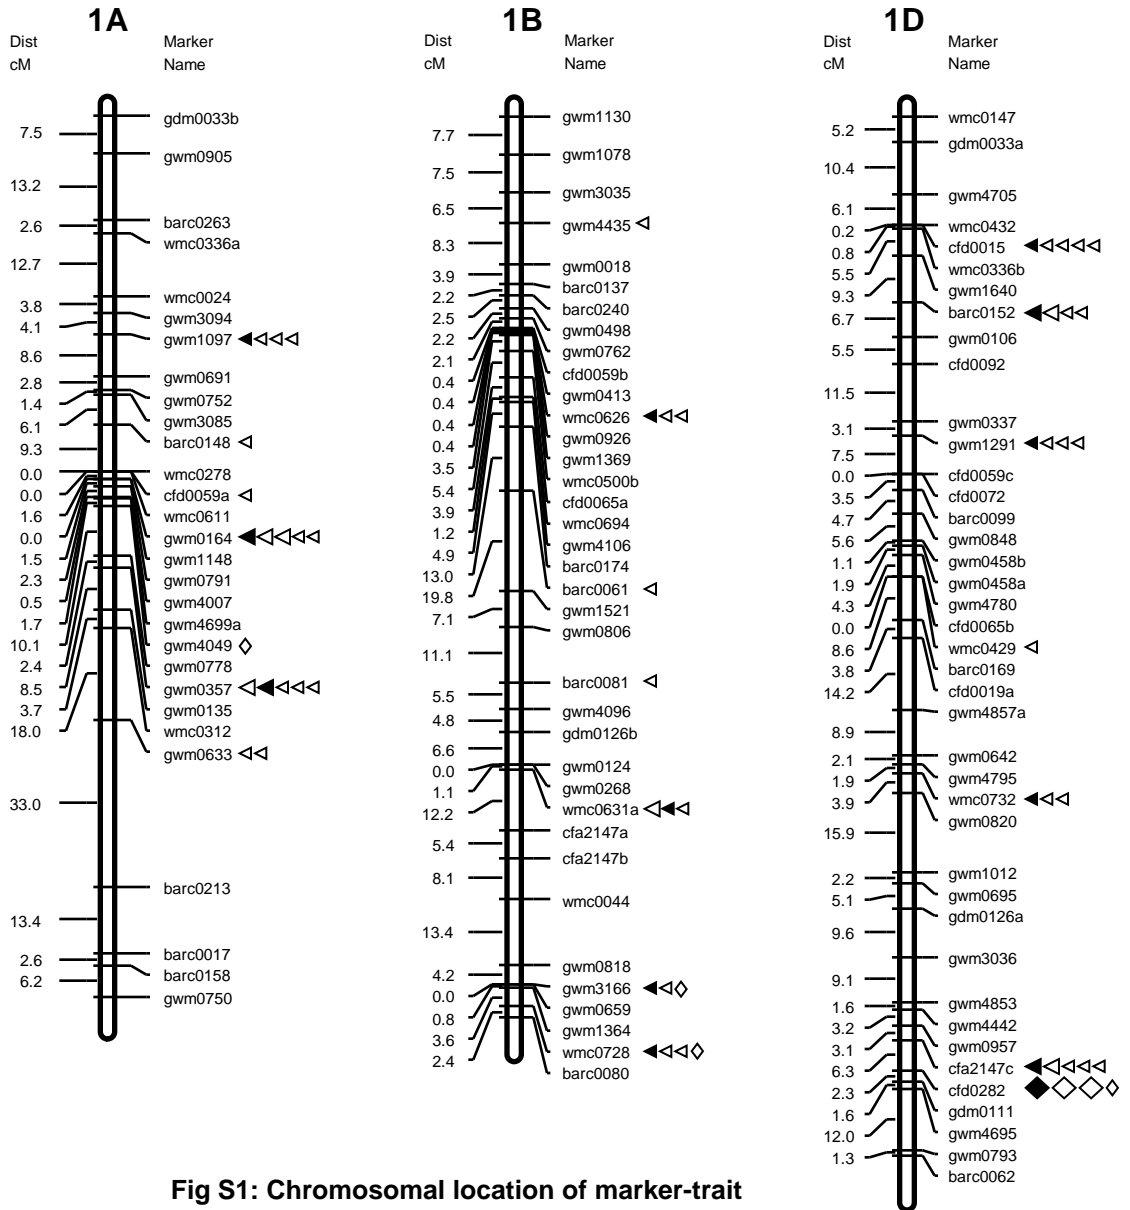

**Fig S1: Chromosomal location of marker-trait associations.**

- ◁ Resistance decreasing effect, single environment,  $-\log_{10}(p)$ -value > 3.0
- ◁ Resistance decreasing effect, single environment,  $-\log_{10}(p)$ -value > 4.82
- ◀ Resistance decreasing effect, BLUES-value,  $-\log_{10}(p)$ -value > 3.0
- ◀ Resistance decreasing effect, BLUES-value,  $-\log_{10}(p)$ -value > 4.82

- ◇ Resistance increasing effect, single environment,  $-\log_{10}(p)$ -value > 3.0
- ◇ Resistance increasing effect, single environment,  $-\log_{10}(p)$ -value > 4.82
- ◆ Resistance increasing effect, BLUES-value,  $-\log_{10}(p)$ -value > 3.0
- ◆ Resistance increasing effect, BLUES-value,  $-\log_{10}(p)$ -value > 4.82

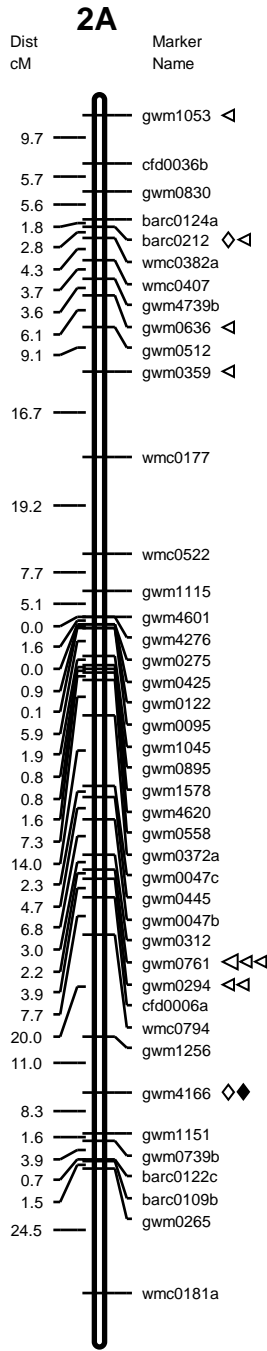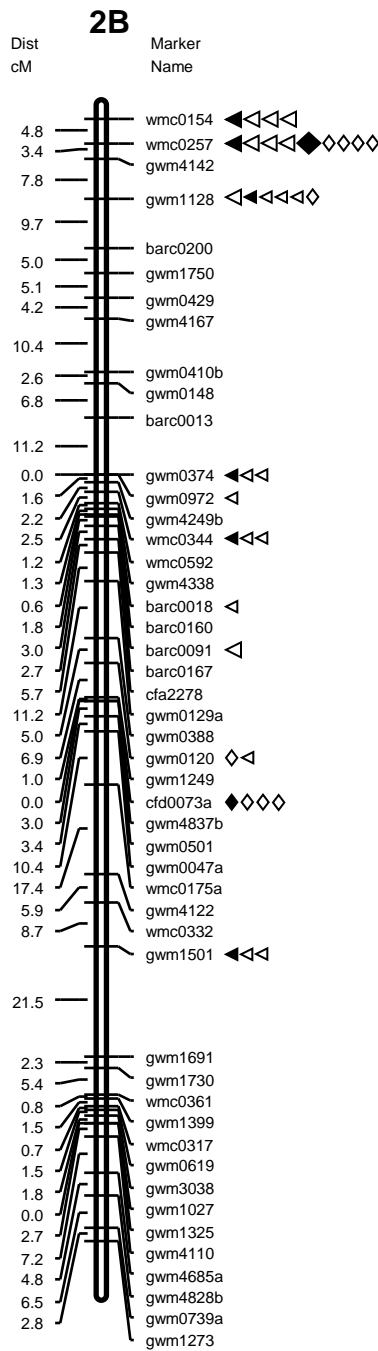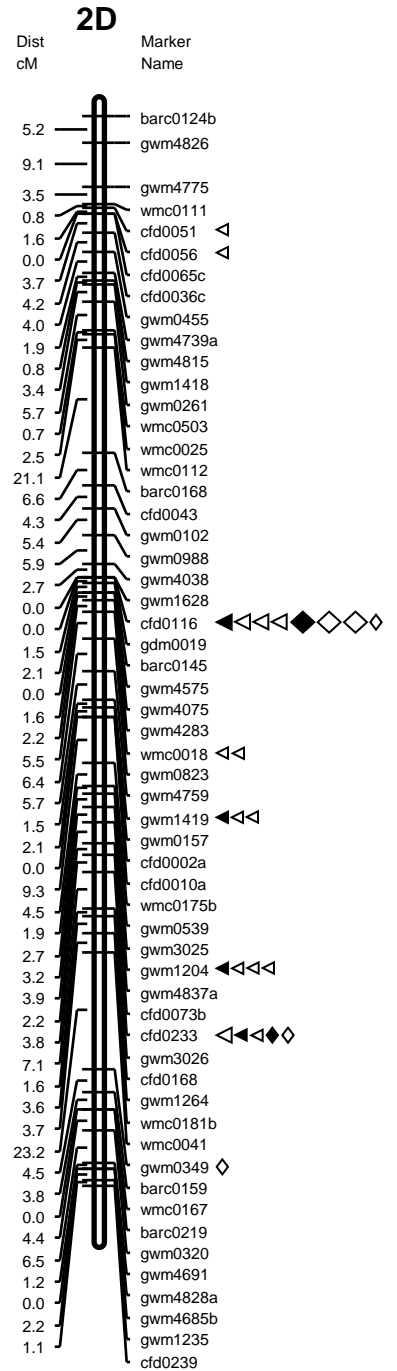

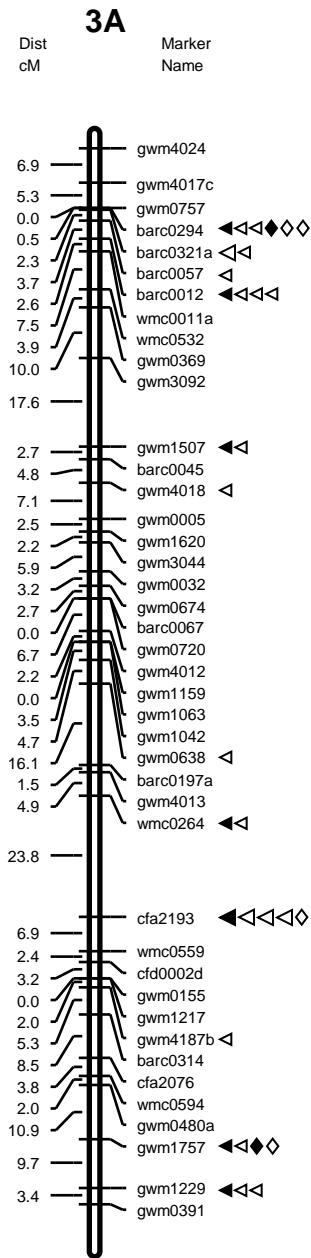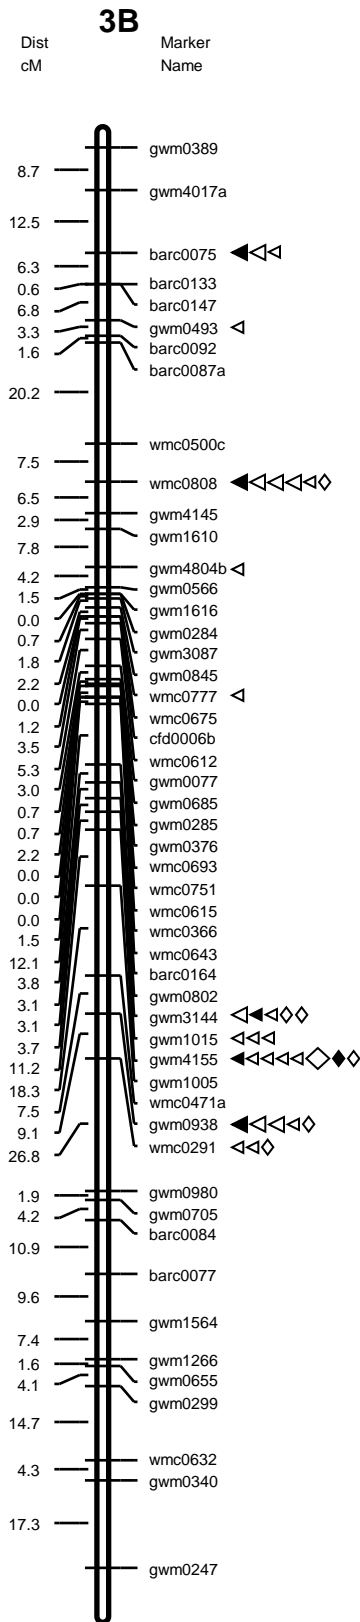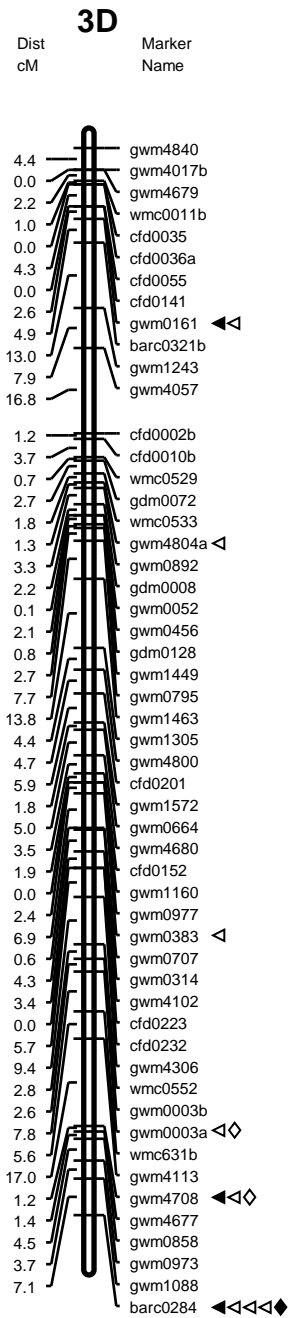

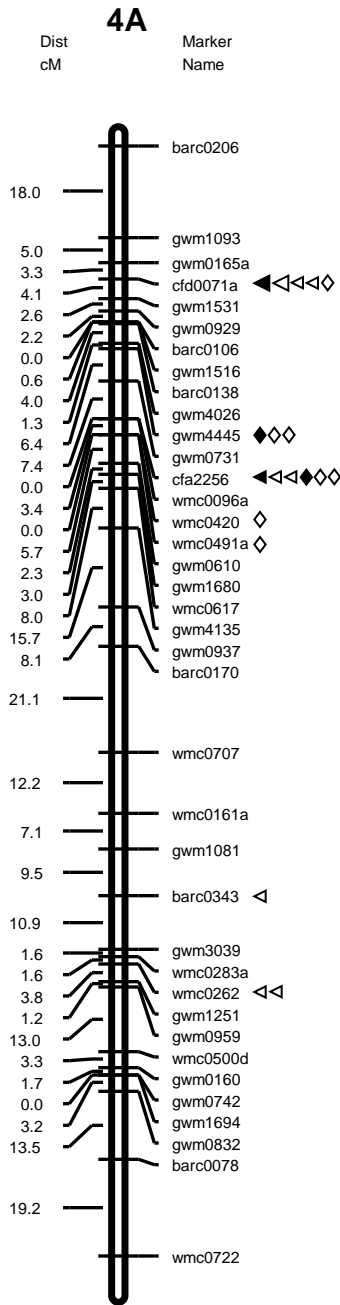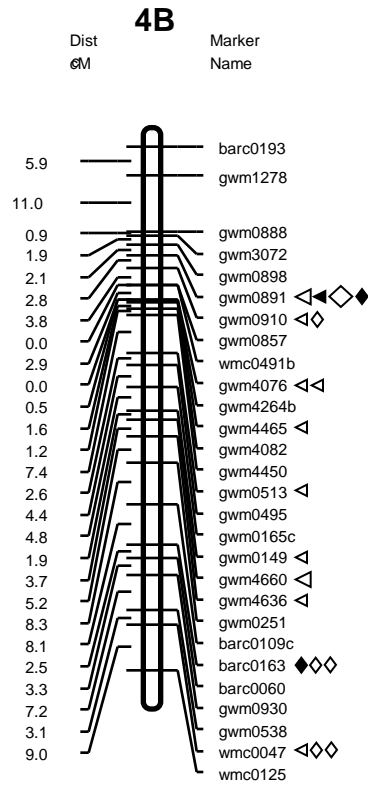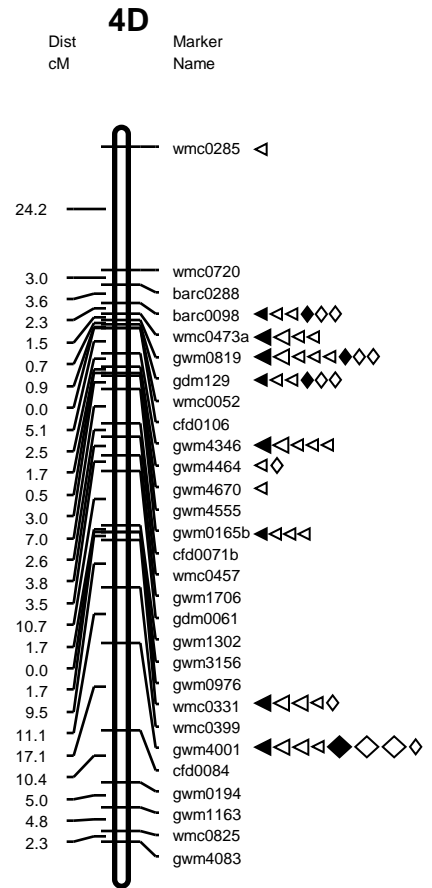

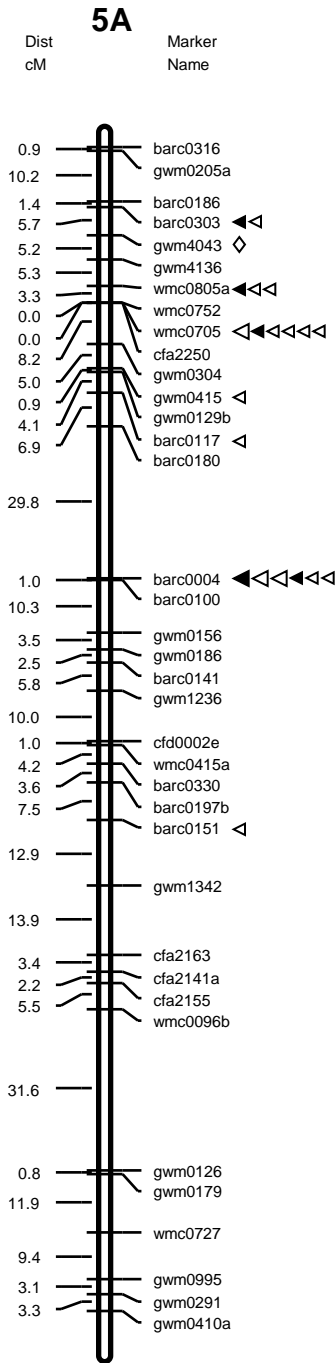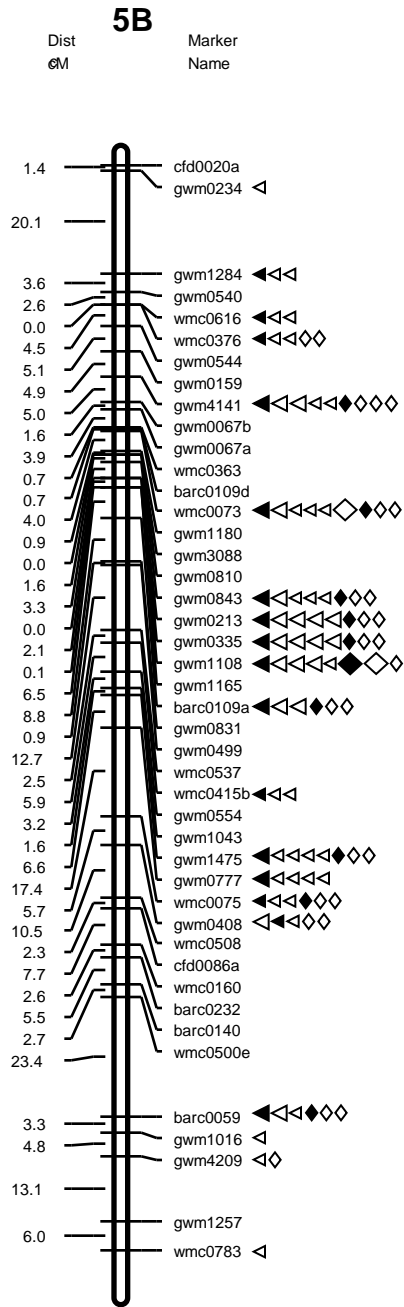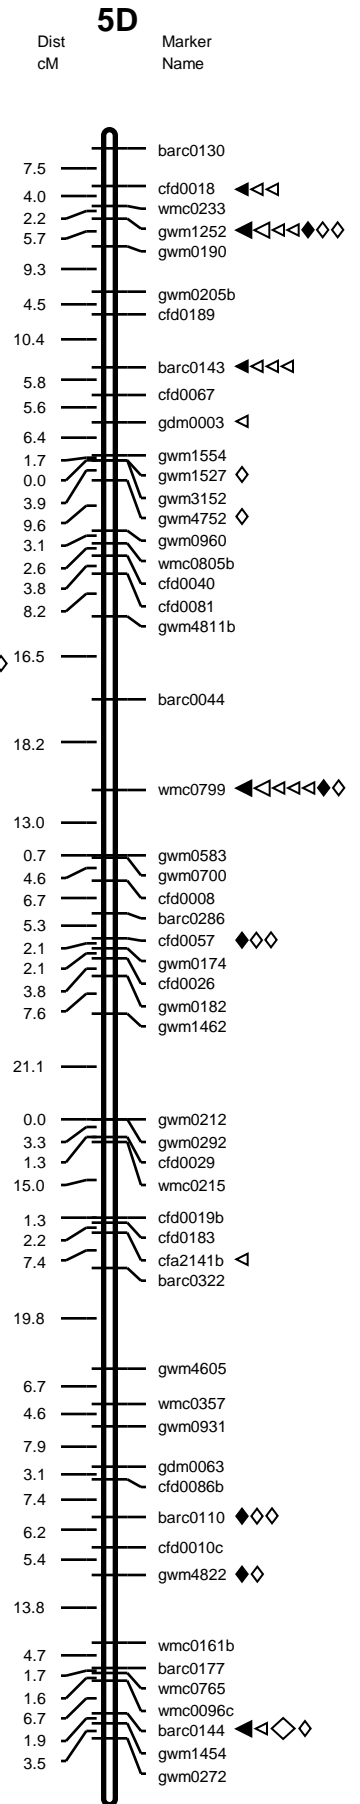

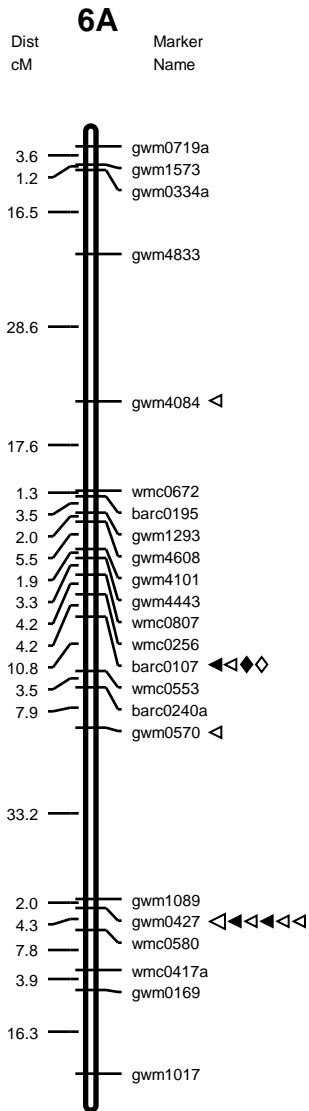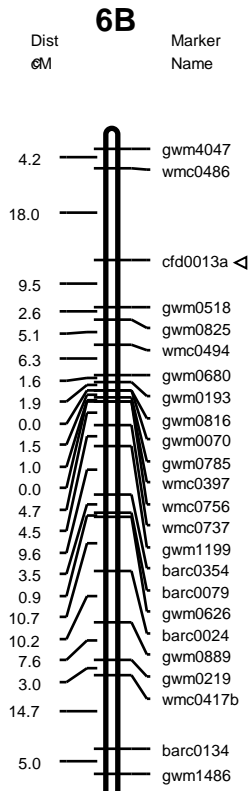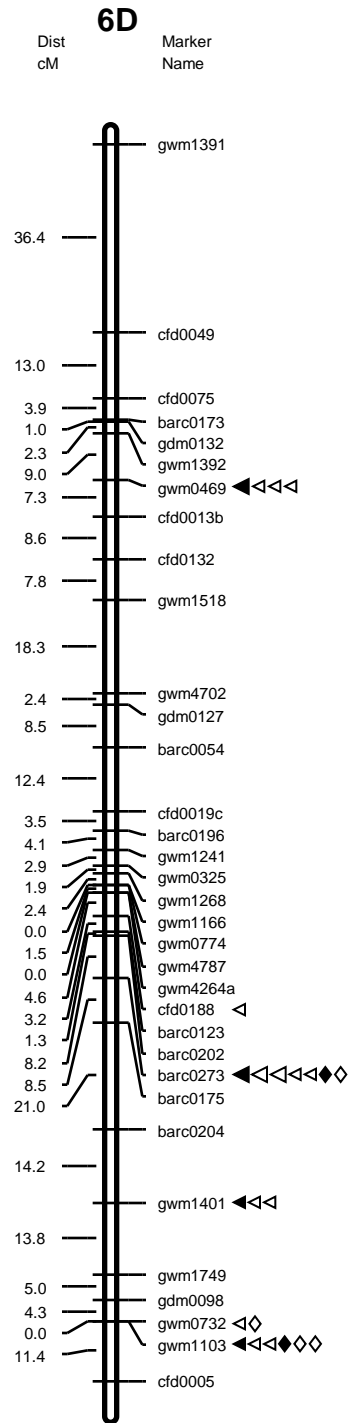

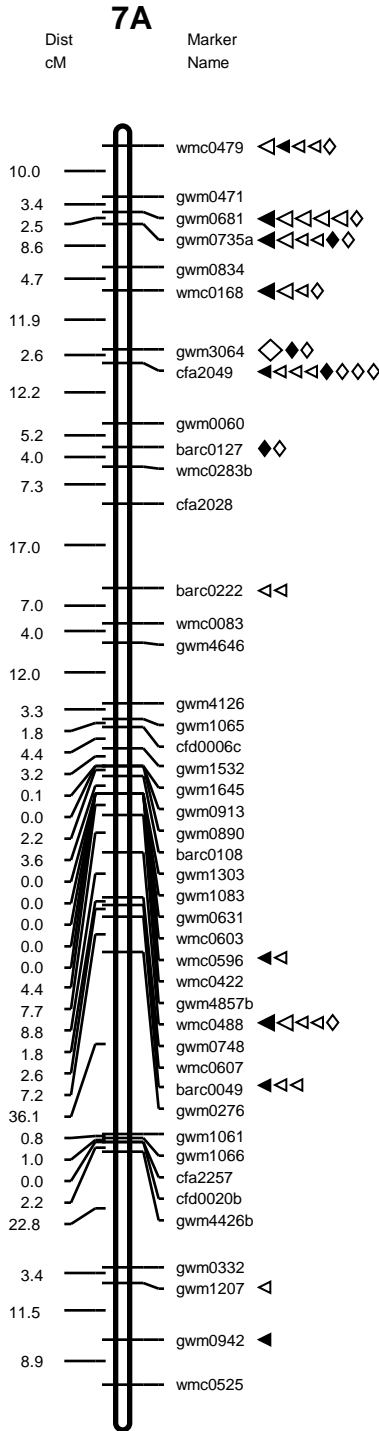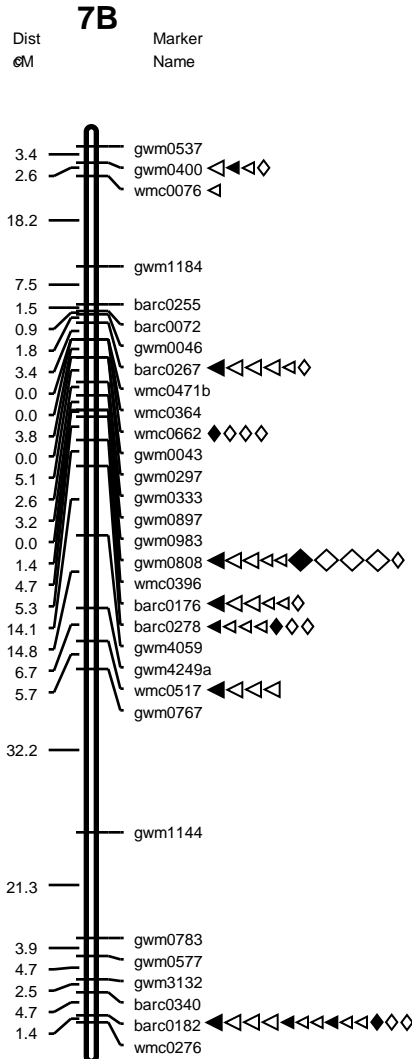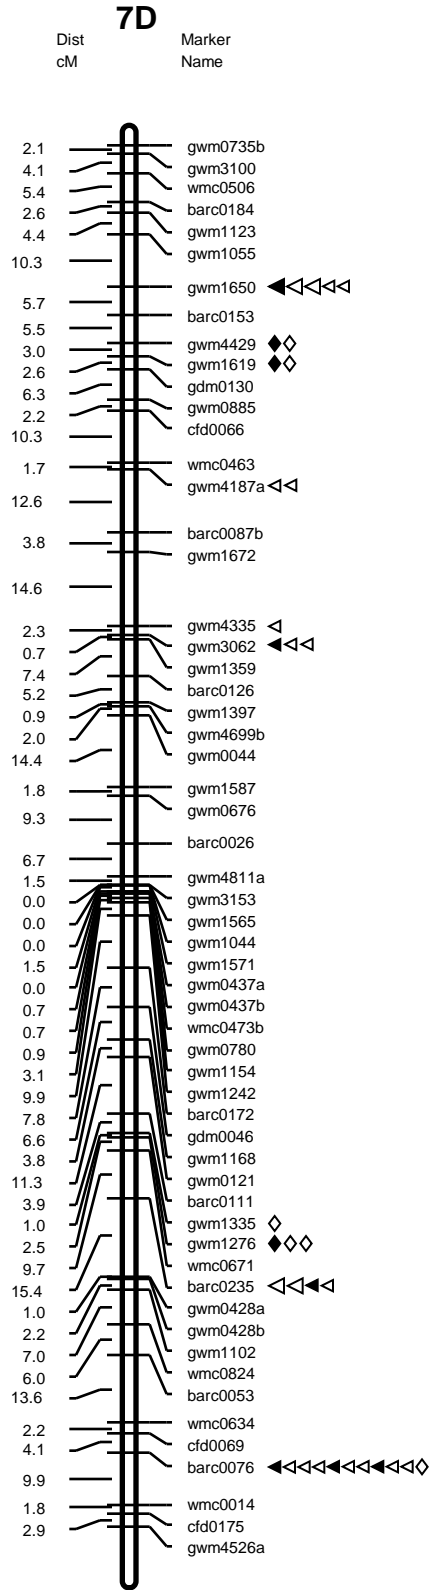

Supplement: pone.0057500.s001.pdf [file pone.0057500.s001.pdf]
