# Supplementary material for: Whole Genome Association Mapping of Fusarium Head Blight Resistance in European Winter Wheat (Triticum aestivum L.)
Source: PubMed Central journal article supplement (PMC3579808; doi:10.1371/journal.pone.0057500), 2013-02-22
Supplement: pone.0057500.s002.pdf [file pone.0057500.s002.pdf]

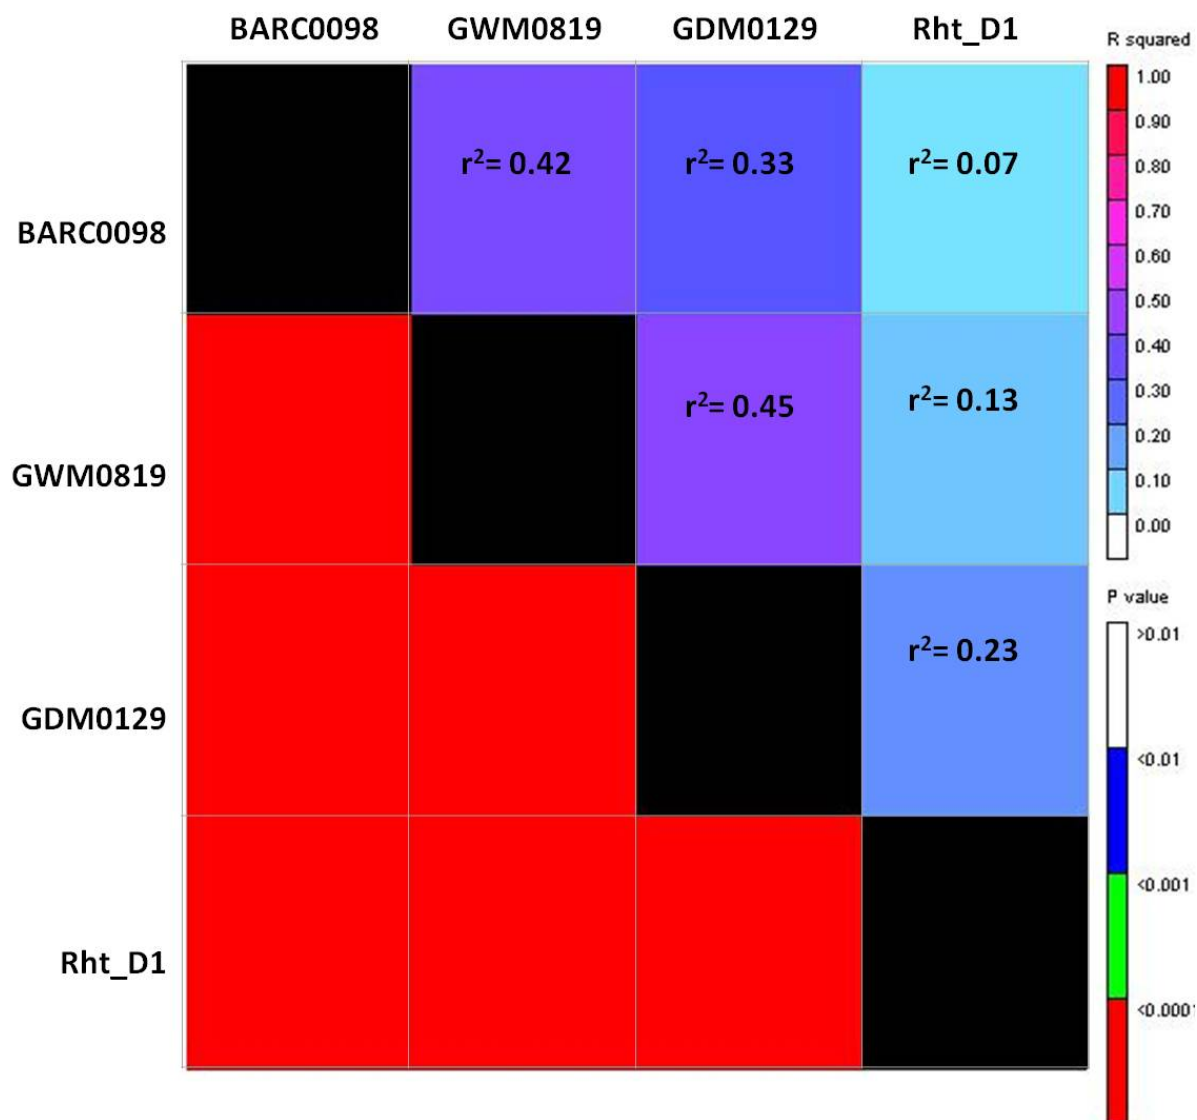

Figure S2: Analysis of linkage disequilibrium (LD) in the region of *Rht-D1* on chromosome 4D.
